# Supplementary material for: A cocatalyst-free CdS nanorod/ZnS nanoparticle composite for high-performance visible-light-driven hydrogen production from water
Source: Royal Society of Chemistry journal article supplement (doi:10.1039/c5ta07420g), 2015-11-16
Supplement: c5ta07420g1.pdf [file c5ta07420g1.pdf]

*Supporting information*

**Cocatalyst-Free CdS nanorods/ZnS nanoparticles Composite for  
High-Performance Visible-Light-Driven Hydrogen Production from  
Water**

Daochuan Jiang, Zijun Sun, Hongxing Jia, Dapeng Lu, Pingwu Du\*

Key Laboratory of Materials for Energy Conversion, Chinese Academy of Sciences,  
Department of Materials Science and Engineering, *i*ChEM (Collaborative Innovation  
Center of Chemistry for Energy Materials), University of Science and Technology of  
China, Hefei, Anhui Province, 230026, P. R. China

\*To whom correspondence should be addressed

E-mail: [dupingwu@ustc.edu.cn](mailto:dupingwu@ustc.edu.cn)

Tel/Fax: 86-551-63606207

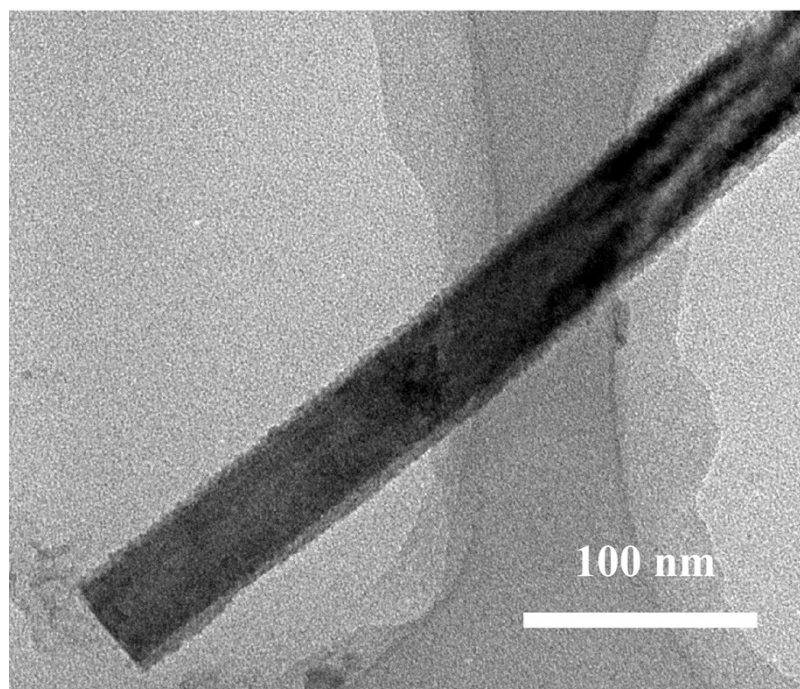

**Figure 1.** TEM image of CdS/ZnS-0.5 NRs photocatalyst.

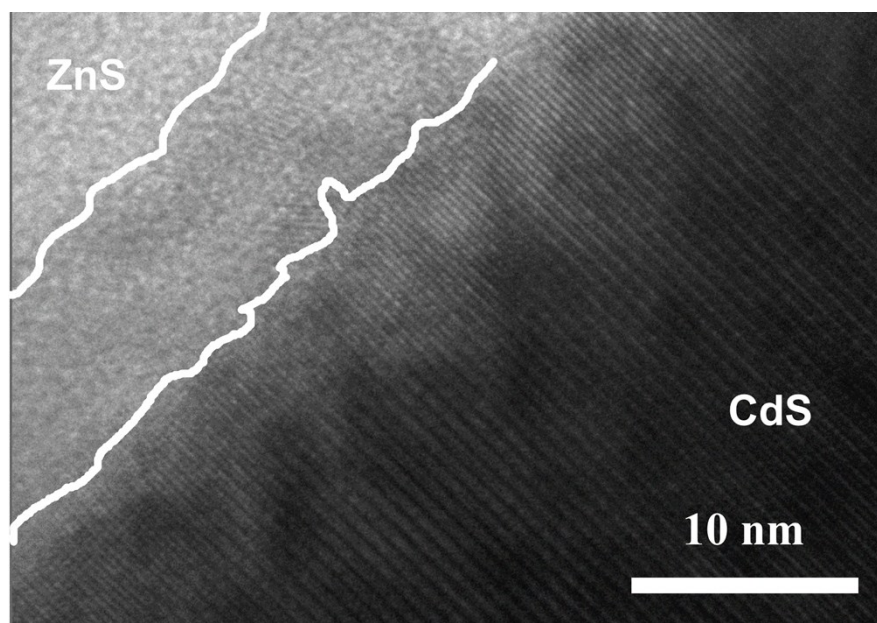

**Figure S2.** HRTEM image of CdS/ZnS-0.5 photocatalyst.

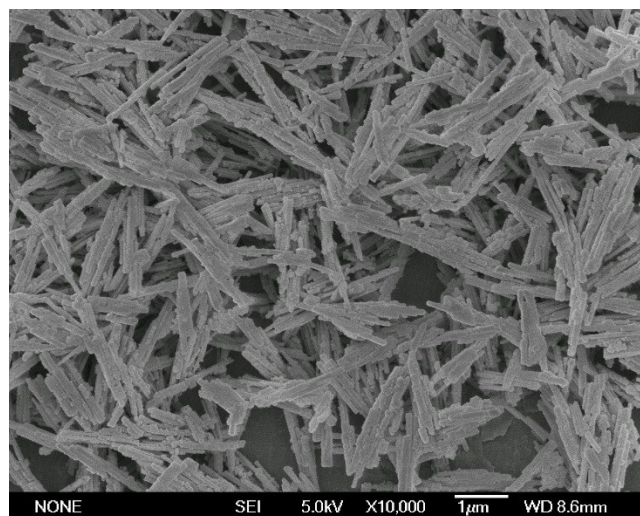

**Figure S3.** SEM image of CdS/ZnS-0.5 sample after photocatalysis.

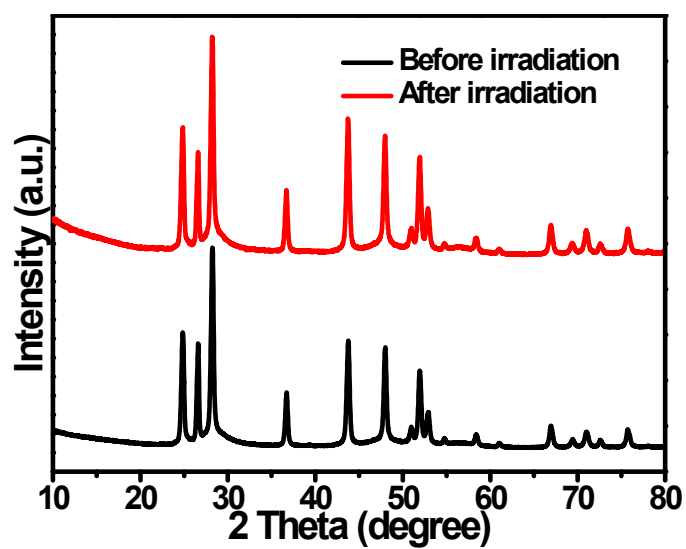

**Figure S4.** Powder XRD spectrum of CdS/ZnS-0.5 sample after photocatalysis.

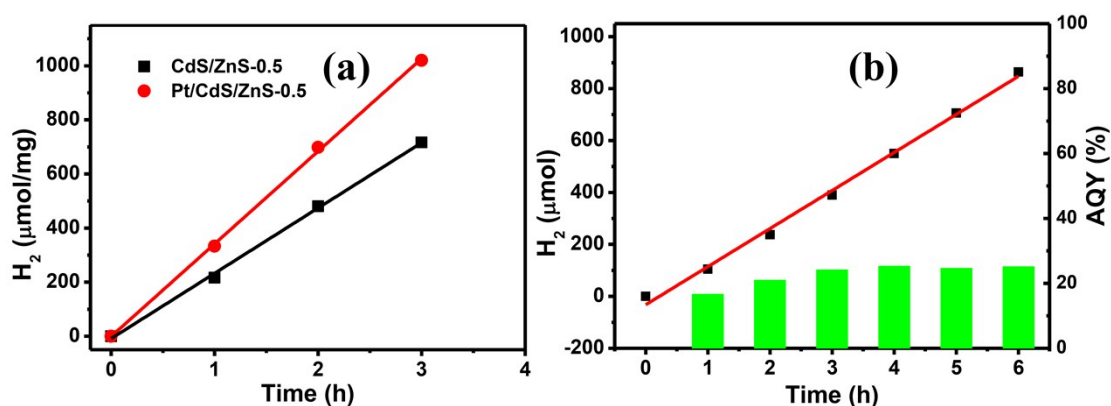

**Figure S5.** (a) Photocatalytic  $H_2$  evolution over CdS/ZnS-0.5 (black line) and 1 wt% Pt/CdS/ZnS-0.5 (red line) at room temperature under visible light ( $\lambda > 420$  nm). (b) The time courses of  $H_2$  production and apparent quantum yield (AQY) over 1.0 wt% Pt modified CdS/ZnS-0.5 NRs photocatalyst under monochromatic 420 nm light irradiation. The system contains 1.0 mg photocatalyst, 0.75 M  $\text{Na}_2\text{S}$  and 1.05 M  $\text{Na}_2\text{SO}_3$  in 20 mL aqueous solution. The bars represent the apparent quantum yields.

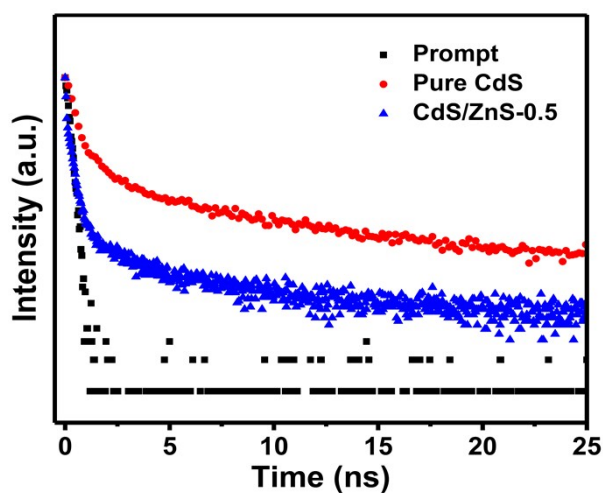

**Figure S6.** Time-resolved photoluminescence (TRPL) decay spectra of pure CdS (red) and CdS/ZnS-0.5 (blue) excited at a wavelength of 405 nm.
